# Supplementary material
Source: PubMed Central journal article supplement (PMC6279516)
Supplement: NIHMS1503972-supplement-1.pdf [file NIHMS1503972-supplement-1.pdf]

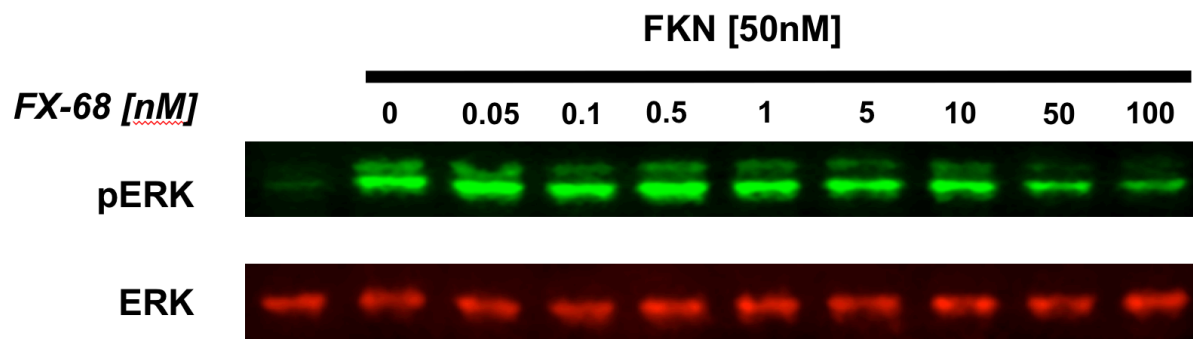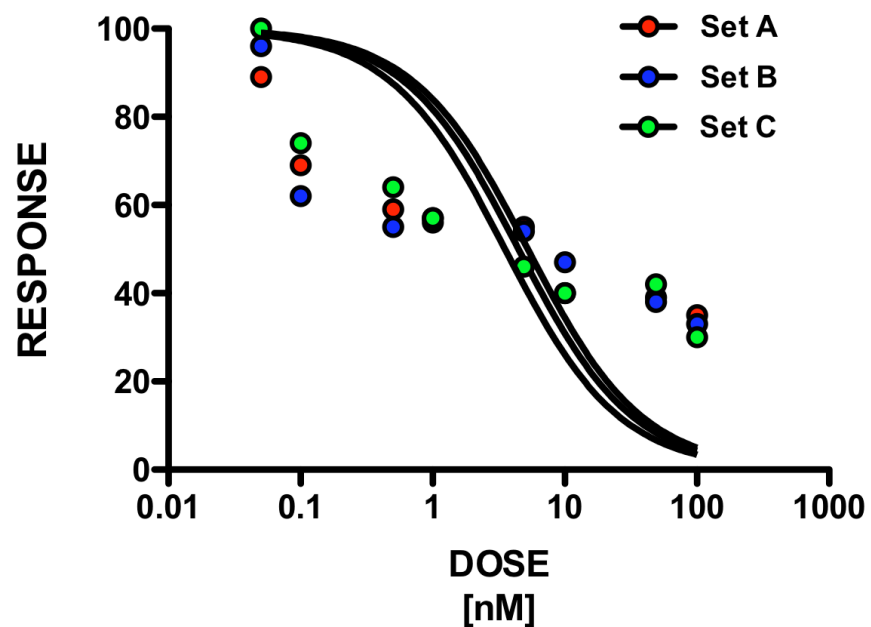

**Functional IC<sub>50</sub> for the small molecule compound FX-68.** PC3-ML prostate cancer cells were exposed for 15 minutes to 50nM Fractalkine to stimulate CX3CR1 and the inhibitory effect of FX-68 on downstream activation of the MAPK pathway was assessed by measuring the extent of ERK1/2 phosphorylation by quantitative Western blotting. Eight concentrations of FX-68 were tested in three separate experiments and the percentage of inhibitions for each concentration, normalized for total ERK as loading control and compared to cells exposed to the chemokine in the absence of FX-68 were averaged. The IC<sub>50</sub> was calculated at ~ 5.0nM using Prism (GraphPad Software).
